# Supplementary material
Source: MDPI journal article supplement (https://www.mdpi.com/2071-1050/12/17/7223)
Supplement: s1 [file s1]

**Table S1. Volume of production and annual income of surveyed producers (realized and expected amounts)**

| Product name                                                         | Production volume in 2018 (in units of the product) | Annual sales income in 2018 (in EUR) | Expected volume of production of agri-food products in 2019 (in units of products) | Expected income from the sale of agri-food products in 2019 (in EUR) |
|----------------------------------------------------------------------|-----------------------------------------------------|--------------------------------------|------------------------------------------------------------------------------------|----------------------------------------------------------------------|
| Wine                                                                 | 2,000 l                                             | 2,020                                | 12,000 l                                                                           | 25,253                                                               |
| Honey                                                                | 1,600 t                                             | 6,018,625                            | 1,700 t                                                                            | 6,313,243                                                            |
| Osmotic dried fruit cubes                                            | test production                                     | n/a                                  | 120 t                                                                              | n/a                                                                  |
| Handmade candies, licider hearts, ratluk and other sugar products    | 3 t                                                 | 12,626                               | 3 t                                                                                | 12,626                                                               |
| Aronia liqueur                                                       | 300 l                                               | 2,104                                | 500 l                                                                              | 4,209                                                                |
| Aronia juice                                                         | 500 l                                               | 3,788                                | 1000 l                                                                             | 8,418                                                                |
| Raspberry and blackberry                                             | 6.5 t                                               | 3,763                                | 7 t                                                                                | 2,946                                                                |
| Plum brandy                                                          | 180 l                                               | 303                                  | 500 l                                                                              | 842                                                                  |
| Honey                                                                | 3.8 t                                               | 9,933                                | 5.5 t                                                                              | 12,626                                                               |
| Djerdap honey (1 jar = 0.75 kg)                                      | 2,000 jars                                          | 13,468                               | 2,000 jars                                                                         | 13,468                                                               |
| Syrup/juice of raspberry and blackberry                              | 800 l                                               | 2,020                                | 1,600 l                                                                            | 4,040                                                                |
| Quails eggs                                                          | 72,000                                              | 6,061                                | 93,600                                                                             | 8,418                                                                |
| Blackberry wine                                                      | 500 l                                               | 253                                  | 1,500 l                                                                            | 842                                                                  |
| Honey brandy                                                         | 1,000 l                                             | 842                                  | 1,000 l                                                                            | 3,367                                                                |
| Honey                                                                | 10 t                                                | 42,088                               | 10 t                                                                               | 42,088                                                               |
| Wine (1 bottle = 0.75 l)                                             | 60,000 bottles                                      | 277,783                              | 80,000 bottles                                                                     | 336,706                                                              |
| Ajvar Radić                                                          | 6,500 jars                                          | 21,886                               | 7,800                                                                              | 29,546                                                               |
| Sweet from the white cherry                                          | 400 jars                                            | 1,347                                | 500 jars                                                                           | 1,684                                                                |
| Honey, pollen powder, royal jelly                                    | 1,900 kg                                            | 4,882                                | 2,200 kg                                                                           | 5,556                                                                |
| Acacia honey                                                         | 2,000 kg                                            | 5,051                                | 2,000 kg                                                                           | 5,051                                                                |
| Grapes                                                               | 2000 kg                                             | 842                                  | 2,500 kg                                                                           | 1,263                                                                |
| Ajvar                                                                | 100 jars                                            | 421                                  | 150 jars                                                                           | 631                                                                  |
| Jam of rose hip                                                      | 400 jars                                            | 1,347                                | 500 jars                                                                           | 1,684                                                                |
| Ajvar                                                                | 300 jars                                            | 1,263                                | 400 jars                                                                           | 1,684                                                                |
| Ajvar                                                                | 300 jars                                            | 1,263                                | 400 jars                                                                           | 1,684                                                                |
| Plum jam                                                             | 400 jars                                            | 1,010                                | 500 jars                                                                           | 1,263                                                                |
| Cheese                                                               | 2000 kg                                             | 5,056                                | 2500 kg                                                                            | 6,313                                                                |
| Ajvar                                                                | 200 jars                                            | 842                                  | 250 jars                                                                           | 1,052                                                                |
| Ajvar                                                                | 100 jars                                            | 421                                  | 150 jars                                                                           | 631                                                                  |
| Sweet from roasted quince with walnut                                | 500 jars                                            | 1,684                                | 600 jars                                                                           | 2,104                                                                |
| Tortes and sweet cakes                                               | 500 kg                                              | 5,051                                | 600 kg                                                                             | 6,313                                                                |
| Strawberries                                                         | 3 t                                                 | 2,525                                | 6 t                                                                                | 5,051                                                                |
| Sweet, jams, marmalades and juices of currant, raspberry and apricot | 100 kg-100 l                                        | 842                                  | 100 kg-100 l                                                                       | 842                                                                  |
| Milk                                                                 | 35,000 l                                            | 11,490                               | 40,000 l                                                                           | 13,468                                                               |
| Veverko-honey cream with hazelnut                                    | 5,000                                               | 25,253                               | 10,000                                                                             | 50,506                                                               |
| Homolje beer                                                         | n/a                                                 | n/a                                  | n/a                                                                                | n/a                                                                  |
| Homoljska zdravica (Plum brandy with added medicinal herbs)          | 500 l                                               | 7,576                                | 700 l                                                                              | 10,606                                                               |
| Brandy "Legenda"                                                     | 4,500 l                                             | 2,104                                | 5,000-7,000 l                                                                      | 2,525                                                                |
| Honey from Homolje                                                   | 2 t                                                 | 13,468                               | 5 t                                                                                | 33,671                                                               |
| Full fat extra hard goat cheese                                      | n/a                                                 | n/a                                  | n/a                                                                                | n/a                                                                  |
| Full fat soft goat cheese                                            | n/a                                                 | n/a                                  | n/a                                                                                | n/a                                                                  |
| Full fat soft sheep cheese                                           | n/a                                                 | n/a                                  | n/a                                                                                | n/a                                                                  |
| Full fat semi-hard cheese in olive oil with herbs                    | n/a                                                 | n/a                                  | n/a                                                                                | n/a                                                                  |

|                                                                                                                                                                      |           |           |           |           |
|----------------------------------------------------------------------------------------------------------------------------------------------------------------------|-----------|-----------|-----------|-----------|
| Full fat semi-hard goat cheese                                                                                                                                       | n/a       | n/a       | n/a       | n/a       |
| Full fat hard goat cheese                                                                                                                                            | n/a       | n/a       | n/a       | n/a       |
| Melted spread from full fat goat cheese                                                                                                                              | n/a       | n/a       | n/a       | n/a       |
| Homolje sour cream                                                                                                                                                   | n/a       | n/a       | n/a       | n/a       |
| Homolje yogurt                                                                                                                                                       | n/a       | n/a       | n/a       | n/a       |
| Homolje cheese                                                                                                                                                       | n/a       | n/a       | n/a       | n/a       |
| Homolje home-made syrup of wild blackberry                                                                                                                           | 300 l     | 1,010     | 500 l     | 1,684     |
| Homolje home-made syrup of wild cherry                                                                                                                               | 300 l     | 1,263     | 500 l     | 2,104     |
| Homolje home-made syrup of cornelian cherry                                                                                                                          | 200 l     | 505       | 500 l     | 1,263     |
| Homolje "Happy Brine"                                                                                                                                                | 150 kg    | 379       | 200 kg    | 505       |
| Homolje jam of rose hip                                                                                                                                              | 300 kg    | 1,263     | 500 kg    | 2,104     |
| Homolje pasteurized wild garlic                                                                                                                                      | 300 kg    | 758       | 400 kg    | 1,010     |
| Jam of autochthonous plum variety Čitlavka                                                                                                                           | 300 kg    | 1,010     | 500 kg    | 1,684     |
| Homolje sweet of cornelian cherry with wild hazelnut                                                                                                                 | 100 kg    | 337       | 200 kg    | 673       |
| Homolje sweet of mulberry                                                                                                                                            | 200 kg    | 505       | 500 kg    | 1,263     |
| Homolje sweet of forest strawberry                                                                                                                                   | 400 kg    | 1,684     | 500 kg    | 2,104     |
| Jevtić brandy (quince, pear, apricot, plum, cherry, apple)                                                                                                           | 1,500 l   | 2,525     | 1,500 l   | 2,525     |
| Aronia Nero                                                                                                                                                          | 13,000 kg | 13,132    | 20,000 kg | 20,202    |
| Djerdap honey                                                                                                                                                        | 4,000 kg  | 8,418     | 4,000 kg  | 8,418     |
| Mixed salads; cucumber, beetroot, peppers and mushrooms, cut and whole; concentrate and juice of tomato and beetroot; various sauces; mixed jams; ajvar; and ketchup | n/a       | 1,587,734 | n/a       | 1,683,531 |
| Grape                                                                                                                                                                | 24 t      | 10,101    | 25 t      | n/a       |
| Honey                                                                                                                                                                | 2 t       | n/a       | 2 t       | n/a       |
| Brandy                                                                                                                                                               | 1,000 l   | 3,367     | 1,500 l   | 5,051     |
| Honey                                                                                                                                                                | 500 kg    | 10,101    | 1,000 kg  | 20,202    |

\*n/a – not available

Source: Author research;
